# Supplementary material for: Versatile multi-functionalization of protein nanofibrils for biosensor applications
Source: Royal Society of Chemistry journal article supplement (doi:10.1039/c3nr05752f), 2013-11-22
Supplement: c3nr05752f.pdf [file c3nr05752f.pdf]

## Electronic Supplementary Information (ESI)

### Versatile multi-functionalization of protein nanofibrils for biosensor applications

L. Sasso,<sup>\*abc</sup> S. Swei,<sup>bd</sup> L. Domigan,<sup>abce</sup> J. Healy,<sup>bc</sup> V. Nock,<sup>abf</sup> M. A. K. Williams<sup>adg</sup> and J. A. Gerrard<sup>\*abch</sup>

<sup>a</sup> MacDiarmid Institute for Advanced Materials and Nanotechnology, Wellington 6140, New Zealand.

<sup>b</sup> Biomolecular Interaction Centre, University of Canterbury, Christchurch 8140, New Zealand.

<sup>c</sup> School of Biological Sciences, University of Canterbury, Christchurch 8140, New Zealand.

<sup>d</sup> Institute of Fundamental Sciences, Massey University, Palmerston North 4442, New Zealand.

<sup>e</sup> Department of Biomedical Engineering, Tufts University, Medford 02155, MA, USA.

<sup>f</sup> Department of Electrical and Computer Engineering, University of Canterbury, 8140, New Zealand.

<sup>g</sup> Riddet Institute, Massey University, Palmerston North 4442, New Zealand.

<sup>h</sup> Callaghan Innovation Research Ltd, Lower Hutt 5040, New Zealand.

|                                                                             |          |
|-----------------------------------------------------------------------------|----------|
| <b>S1. Cyclic voltammetry characterization of biosensor platform.....</b>   | <b>2</b> |
| <b>S2. Biosensor response to various glucose concentrations.....</b>        | <b>3</b> |
| <b>S3. Electrode roughness due to protein nanofibril modifications.....</b> | <b>4</b> |

### S1. Cyclic voltammetry characterization of biosensor platform

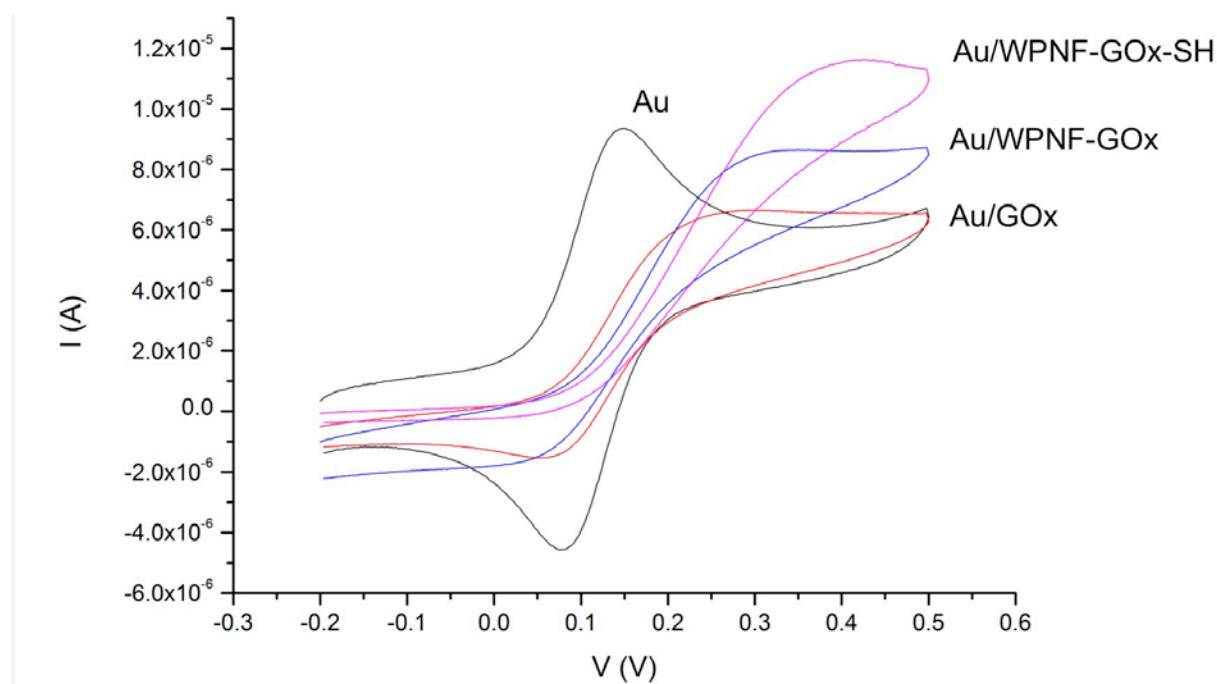

**Figure S1.** Comparison of glucose responses with same concentration (500 mM) for different enzyme immobilization methods: adsorption onto a bare gold electrode (Au/GOx), GOx-functionalized WPNFs deposition (Au/WPNF-GOx), dual GOx- and SH-functionalized WPNFs deposition (Au/WPNF-GOx-SH), and a bare electrode with no enzyme immobilization (Au), where the signal is solely caused by the ferrocene mediator. Potential sweep rates are 100 mV/s for all curves, using an Au counter and Ag reference electrode.

## S2. Biosensor response to various glucose concentrations

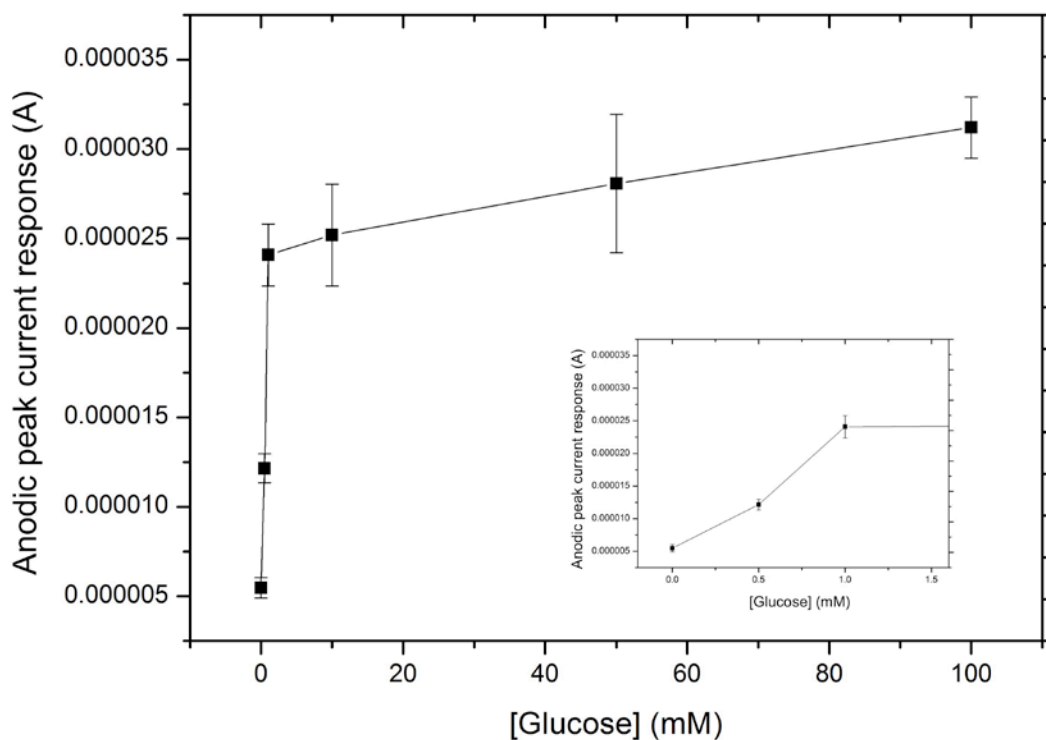

**Figure S2.** Comparison of biosensor current peak response for different concentrations of glucose. Inset shows the linear response for glucose concentrations smaller than 2 mM. Potential sweep rates are 100 mV/s for all curves, using an Au counter and Ag reference electrode. The limit of detection was calculated to be 0.11 mM (3 sigma method).

### S3. Electrode roughness due to protein nanofibril modifications

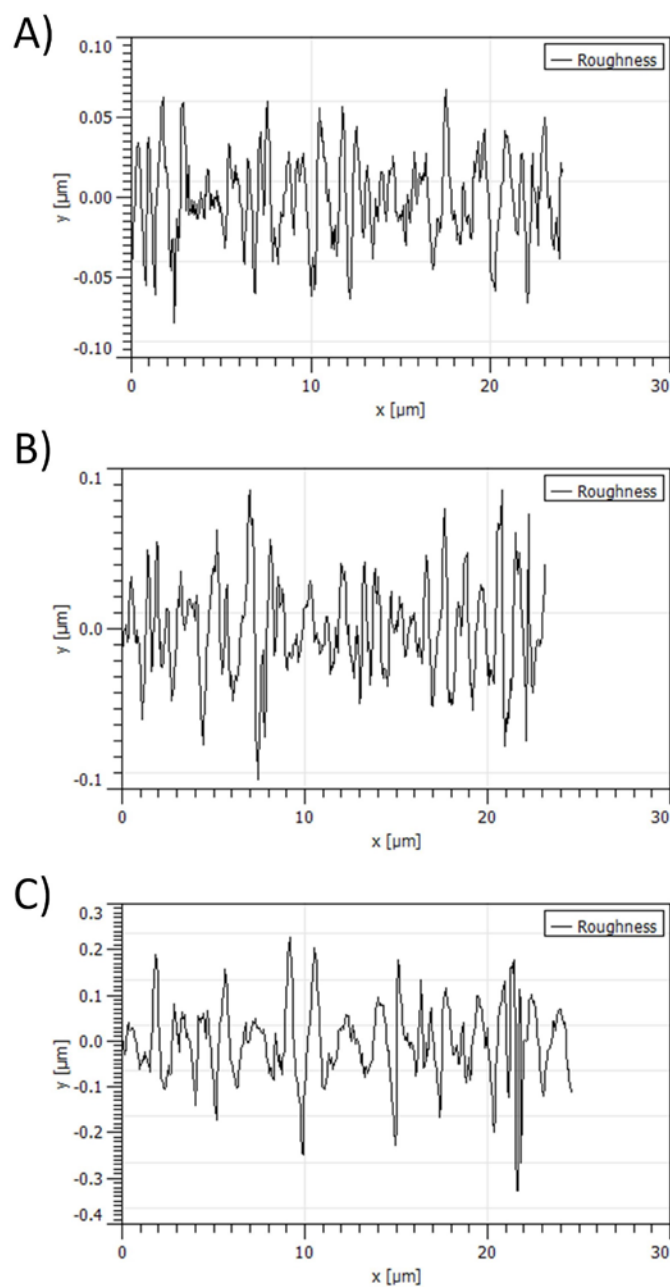

**Figure S3.** Comparison of electrode roughness due to WPNF modifications, from AFM imaging: A) bare Au electrode, B) electrode after WPNFs deposition, and C) electrode after SH-functionalized WPNFs deposition. All samples were rinsed with milliQ water before AFM measurements.
